# Supplementary material for: Above- and below-ground trait coordination in tree seedlings depend on the most limiting resource: a test comparing a wet and a dry tropical forest in Mexico
Source: PeerJ. 2022 Jun 14;10:e13458. doi: 10.7717/peerj.13458 (PMC9205306; doi:10.7717/peerj.13458)
Supplement: Supplemental Information 10 [file peerj-10-13458-s010.xlsx]

## Sheet: Moist forest
Confidential raw data to be used only for the purposes of paper review. After paper acceptance, these Raw data will not be stored in PeerJ but in DRYAD.
		Transformation with Log10?	Yes	No	Yes	Yes	No	Yes	Yes	Yes	Yes	Yes
		Residuals of regression with biomass?	Yes	No	Yes	No	No	Yes	Yes	Yes	Yes	Yes
Code	Species	Forest	SLA	LTh	LWC	MPU	WD	SWC	SRL	RTh	RD	MRD
Aca-hay	Acacia_hayesii	Chajul	0.0269536	0.08	-0.251252	-0.619789	0.74	-0.225082	0.260464	-0.0103143	-0.150629	0.0817842
Aca-sp	Acacia_sp	Chajul	-0.0838519	0.11	-0.224955	0.155336	0.96	-0.311385	-0.131172	0.047156	-0.0593903	0.0967065
Alc-lat	Alchornea_latifolia	Chajul	-0.0493508	0.18	-0.124398	1.30363	0.44	0.111213	0.322341	0.0873308	-0.369319	0.0754643
Bel-sp	Belluccia_sp	Chajul	0.130991	0.21	0.039422	1.34733	0.71	0.0606943	0.430352	-0.410756	0.452816	-0.149511
Bro-ali	Brosimum_alicastrum	Chajul	-0.0299336	0.18	-0.105162	1.36791	0.5	-0.135899	-0.00330386	0.0676429	-0.155208	-0.0163823
Bro-cos	Brosimum_costaricanum	Chajul	-0.102244	0.25	-0.266794	1.00475	0.5	-0.130123	-0.044037	0.0914932	-0.143766	0.0239864
Bro-gui	Brosimum_guianense	Chajul	0.00148324	0.22	-0.0529343	0.981819	0.6	-0.127607	0.0504543	0.111117	-0.232412	-0.032369
Bur-sim	Bursera_simaruba	Chajul	0.0850069	0.17	0.179184	0.953276	0.36	0.184657	0.0388219	0.0406969	-0.0872557	-0.102247
Cal-bra	Calophyllum_brasiliense	Chajul	-0.11511	0.16	-0.00312301	0.961895	0.66	-0.0380456	-0.331073	0.0710751	0.189958	0.179323
Cas-ela	Castilla_elastica	Chajul	0.191123	0.22	0.238529	1.56808	0.23	0.311766	0.590434	-0.150081	-0.251131	0.106467
Cec-pel	Cecropia_peltata	Chajul	-0.000147964	0.27	0.00852489	1.68088	0.29	0.106453	-0.330572	-0.074907	0.380963	-0.0772543
Cor-all	Cordia_alliodora	Chajul	-0.064645	0.22	-0.0950384	1.0983	0.51	-0.195958	-0.396261	0.106611	0.165776	0.0561092
Cro-sch	Croton_schiedeanus	Chajul	-0.050508	0.18	0.00957602	1.07115	0.61	-0.286799	-0.270449	0.109436	0.012083	-0.0424282
Cup-gla	Cupania_glabra	Chajul	-0.0334588	0.2	0.0370182	1.51481	0.66	-0.09618	-0.262477	-0.0750301	0.39044	0.0235275
Cym-sp	Cymbopetalum_sp	Chajul	-0.0136939	0.16	0.0914258	0.697229	0.47	0.29993	-0.375804	0.247945	-0.200473	-0.0581509
Dal-gla	Dalbergia_glabra	Chajul	0.0701407	0.13	0.0499397	0.260071	0.75	-0.0613308	-0.178888	-0.100478	0.421048	0.0113487
Dia-gui	Dialium_guianense	Chajul	0.00527246	0.15	0.0562306	0.653213	0.73	-0.214102	0.117948	-0.0452761	-0.0750839	-0.115572
Gua-gla	Guarea_glabra	Chajul	0.0108366	0.2	-0.125249	1.15534	0.57	-0.115196	-0.267843	0.133877	-0.0592729	-0.0340346
Ing-pav	Inga_pavoniana	Chajul	-0.0292537	0.23	-0.0360357	1.27531	0.65	-0.0894462	-0.127652	0.109256	-0.0219673	0.0701773
Lic-hyp	Licania_hypoleuca	Chajul	-0.111638	0.16	-0.226042	0.487138	0.88	-0.258352	-0.484112	-0.0856101	0.649935	0.135135
Lon-cru	Lonchocarpus_sericeus	Chajul	0.0893761	0.16	0.0341046	1.37475	0.58	-0.0267203	-0.231577	-0.0317175	0.353199	0.166607
Lys-aca	Lysiloma_acapulcense	Chajul	0.0466178	0.1	-0.269792	-0.39794	0.57	-0.126169	-0.197385	-0.105197	0.416715	0.144069
Och-pyr	Ochroma_pyramidale	Chajul	-0.0812825	0.27	0.0804419	2.0128	0.11062	0.428219	-0.0805165	0.11858	-0.129164	0.0747784
Ore-pel	Oreopanax_peltatus	Chajul	0.0893868	0.19	0.0574228	1.30535	0.4	0.0506297	0.12605	-0.00382772	-0.107496	-0.00749
Pou-sp	Pouteria_sp	Chajul	-0.132451	0.2	-0.158338	1.17114	0.59	-0.125033	-0.159725	-0.0917462	0.258381	0.0335903
Psy-cus	Psychotria_cuspidata	Chajul	-0.042386	0.22	0.126408	0.951338	0.6	-0.0492589	0.457337	-0.179186	-0.0965168	0.0099772
Psy-mic	Psychotria_micrantha	Chajul	0.0994867	0.24	0.112132	1.10789	0.43	0.0537764	0.312225	-0.149247	-0.0867528	0.0840562
Psy-sp1	Psychotria_sp1	Chajul	-0.0150622	0.15	-0.0519352	1.26245	0.68	-0.0828248	0.687197	-0.175644	-0.00456505	-0.105538
Psy-sp2	Psychotria_sp2	Chajul	0.117843	0.24	0.00526556	1.0086	0.63	-0.239004	0.150356	-0.263105	0.33693	-0.00834441
Pte-roh	Pterocarpus_rohrii	Chajul	-0.201016	0.19	0.0914906	1.13098	0.37	0.0755217	-0.0214154	0.104404	-0.290302	-0.0805964
Sch-par	Schizolobium_parahyba	Chajul	0.243572	0.14	0.214373	0.32838	0.16	0.475504	0.311136	0.0645011	-0.484281	-0.165508
Sip-the	Siparuna_thecaphora	Chajul	0.1224	0.22	0.261935	1.4504	0.51	0.00275997	-0.1413	0.115813	-0.0961522	-0.0673553
Spo-mom	Spondias_mombin	Chajul	0.198276	0.18	0.210047	0.421604	0.29	0.292939	0.184311	0.0310076	-0.0569267	-0.0749182
Tab-alb	Tabernaemontana_alba	Chajul	0.0677742	0.32	0.217113	1.01828	0.62	0.0347288	0.107955	-0.0242558	-0.0805347	0.0376807
The-aho	Thevetia_ahouai	Chajul	-0.113124	0.25	0.268103	1.14489	0.28	0.335536	0.469462	-0.108189	-0.351275	-0.0880096
Tre-mic	Trema_micrantha	Chajul	0.0676183	0.2	-0.00814502	1.43886	0.18	0.247028	0.0684574	-0.0386693	-0.00720531	0.124708
Tri-ery	Trichilia_erythrocarpa	Chajul	-0.0658309	0.15	-0.0314613	0.519828	0.53	-0.0558188	-0.139532	0.0814566	-0.0559182	-0.0372056
Tri-gal	Trichospermum_galeottii	Chajul	-0.0884477	0.2	-0.12268	1.33486	0.32	-0.00192199	-0.0173287	-0.0615447	0.177935	0.042432
Tro-rac	Trophis_racemosa	Chajul	-0.0616164	0.2	-0.00166492	1.3516	0.63	-0.198621	-0.0730184	-0.0244379	0.0281376	-0.0835
Vat-lun	Vatairea_lundellii	Chajul	0.0760026	0.13	-0.0312663	0.515874	0.2	0.414287	0.177803	0.16648	-0.546037	-0.0302499
Voc-gua	Vochysia_guatemalensis	Chajul	-0.15008	0.22	0.05378	1.11361	0.49	-0.0333819	0.0785019	-0.0149808	-0.00184494	-0.100187
Xyl-fru	Xylopia_frutescens	Chajul	-0.0741511	0.11	-0.229174	0.392697	0.88	-0.0837371	-0.241178	0.147785	-0.080144	-0.0187929
Zan-jun	Zanthoxylum_juniperinum	Chajul	-0.0308779	0.17	-0.0270269	0.510545	0.57	-0.177647	-0.434986	0.170535	0.0467081	-0.0822813

## Sheet: Dry forest
		Transformation with Log10?	Yes	Yes	Yes	Yes	Yes	Yes	Yes	Yes	No	No
		Residuals of regression with biomass?	No	No	No	No	No	No	Yes	Yes	Yes	Yes
Code	Species	Forest	SLA	LTh	LWC	MPU	WD	SWC	SRL	RTh	RD	MRD
Aca-far	Acacia_farnesiana	Chamela	2.40783	-0.715287	2.27705	-1.28626	-0.137827	2.05959	0.083162	-0.060058	0.0595266	3.5991
Aca-sp	Acacia_sp	Chamela	2.45345	-0.919013	2.19872	-1.41098	-0.162027	2.14969	0.216255	-0.0278737	0.00442075	6.63291
Amp-ads	Amphipterygium_adstringens	Chamela	2.43556	-0.725553	2.41036	0.434806	-0.463791	2.52763	-0.346146	-0.0608585	0.168701	-4.25547
Apo-pan	Apoplanesia_paniculata	Chamela	2.62948	-0.93601	2.34854	-0.779582	-0.505885	2.47625	0.0275198	0.0715876	0.00997267	1.14288
Ast-gra	Astronium_graveolens	Chamela	2.47493	-0.767004	2.35824	-0.141435	-0.484005	2.42378	0.0371502	0.0342495	0.00138639	-0.912844
Bau-pau	Bauhinia_pauletia	Chamela	2.858	-0.776245	2.68284	0.698976	-0.526949	2.3357	NA	NA	NA	-0.656937
Bur-fag	Bursera_fagaroides	Chamela	2.37348	-0.799514	2.5573	0.552243	-0.595726	2.56598	NA	NA	NA	-4.00166
Bur-ins	Bursera_instabilis	Chamela	2.47649	-0.824682	2.06964	0.984604	-0.536886	2.48772	NA	NA	NA	-5.46027
Bur-sim	Bursera_simaruba	Chamela	2.46934	-0.7925	2.51097	0.170659	-0.544143	2.52	-0.351409	-0.00416892	0.0247402	-8.09423
Cae-cal	Caesalpinia_caladenia	Chamela	2.31033	-0.794187	2.33416	-0.294878	-0.0704629	2.47422	-0.0258032	-0.092958	-0.0162178	6.27788
Cae-cor	Caesalpinia_coriaria	Chamela	2.40281	-0.970075	2.2765	-0.767004	-0.165703	1.98339	NA	NA	NA	5.58954
Cae-eri	Caesalpinia_eriostachys	Chamela	2.38997	-0.836019	2.11084	-0.639187	-0.199335	2.02626	-0.268047	-0.138808	0.163548	8.00867
Cae-pla	Caesalpinia_platyloba	Chamela	2.29514	-0.662541	2.311	0.144587	-0.203078	2.12247	-0.193266	-0.0673765	0.037628	10.1887
Cei-aes	Ceiba_aesculifolia	Chamela	2.45401	-0.846897	2.72666	0.447519	-0.457601	2.36901	NA	NA	NA	-6.63997
Coc-bar	Coccoloba_barbadensis	Chamela	2.17298	-0.627088	2.51227	0.324282	-0.389314	2.26482	NA	NA	NA	2.17905
Coc-lie	Coccoloba_liebmannii	Chamela	2.168	-0.539503	2.2972	0.390935	-0.309432	2.24527	NA	NA	NA	0.896139
Coc-vit	Cochlospermum_vitifolium	Chamela	2.54438	-0.864337	2.51882	0.116413	-0.6098	2.57728	0.171802	-0.0134758	-0.011123	-4.78653
Cor-alb	Cordia_alba	Chamela	2.33738	-0.546682	2.17609	0.0569049	-0.585689	2.57623	NA	NA	NA	4.70193
Cor-all	Cordia_alliodora	Chamela	2.29248	-0.619066	2.29388	1.35622	-0.443031	2.34513	NA	NA	NA	4.81199
Cor-ela	Cordia_elaeagnoides	Chamela	2.31012	-0.571056	2.42769	0.401453	-0.36523	2.28596	-0.155693	-0.020441	-0.026534	-6.33349
Cro-ala	Croton_alamosanus	Chamela	2.6854	-0.726709	2.72049	0.834191	-0.362232	2.24182	NA	NA	NA	-0.769291
Cro-pse	Croton_pseudoniveus	Chamela	2.76309	-0.683052	2.77291	0.44108	-0.368443	2.19302	NA	NA	NA	0.213224
Cro-sub	Croton_suberosus	Chamela	2.7244	-0.415292	2.86431	1.01255	-0.728543	2.48731	NA	NA	NA	-4.44813
Ent-cyc	Enterolobium_cyclocarpum	Chamela	2.63083	-0.746662	2.47712	-0.629354	-0.267606	2.43685	NA	NA	NA	-10.7358
Ery-lan	Erythrina_lanceolata	Chamela	2.48501	-0.607523	2.66256	1.16244	-0.468521	2.53799	0.336328	0.300256	-0.0848325	0.181465
Gli-sep	Gliricidia_sepium	Chamela	2.3392	-0.734004	2.54685	0.766484	-0.167491	2.37742	0.286748	0.253489	-0.0615009	-0.302948
Gua-cou	Guaiacum_coulteri	Chamela	2.26361	-0.562249	2.26066	-0.187686	-0.549707	2.31493	NA	NA	NA	-3.0409
Gua-ulm	Guazuma_ulmifolia	Chamela	2.35245	-0.678298	2.32329	0.295129	-0.545918	2.45951	0.0225523	0.0316007	-0.0458358	0.429271
Hae-bra	Haematoxylum_brasiletto	Chamela	2.83739	-0.76164	2.18911	0.0925525	-0.315595	1.95924	NA	NA	NA	0.92139
Han-chr	Handroanthus_chrysanthus	Chamela	2.38621	-0.64951	2.36765	0.249302	-0.570706	2.46686	-0.196053	0.00724156	-0.0162764	1.30819
Hel-pal	Heliocarpus_pallidus	Chamela	2.45306	-0.649752	2.49843	-0.31075	-0.615886	2.60978	0.152253	0.0510278	-0.0192368	6.20054
Hin-lat	Hintonia_latiflora	Chamela	2.3608	-0.722964	2.33631	-0.617872	-0.545052	2.52481	0.275864	0.128665	0.012358	-2.44801
Jat-cha	Jatropha_chamelensis	Chamela	2.20052	-0.573489	2.57633	1.30508	-0.801282	2.8658	0.0117037	-0.00426845	-0.0645908	-14.5924
Jat-mal	Jatropha_malacophylla	Chamela	2.76628	-0.617263	2.86155	1.65187	-0.990372	2.96547	NA	NA	NA	-12.8993
Jat-sta	Jatropha_standleyi	Chamela	2.25366	-0.638508	2.49751	1.04669	-0.532235	2.54753	-0.0875578	0.0341932	-0.0317728	-8.00587
Lon-con	Lonchocarpus_constrictus	Chamela	2.42948	-0.757293	2.19312	0.806353	-0.314666	2.27255	NA	NA	NA	5.62206
Lon-eri	Lonchocarpus_eriocarinalis	Chamela	2.282	-0.565631	2.23218	0.506614	-0.234051	2.28549	-0.115746	-0.0856694	0.0319882	10.0981
Lon-mag	Lonchocarpus_magallanesii	Chamela	2.35517	-0.769551	2.33425	0.596656	-0.190553	2.29003	-0.168307	-0.118567	0.0633079	-0.545442
Lys-mic	Lysiloma_microphylla	Chamela	2.42627	-0.996755	2.13347	-1.27327	-0.171276	2.04938	0.0186161	-0.0801289	-0.0321391	6.00437
Mim-aca	Mimosa_acantholoba	Chamela	2.80253	-0.874519	1.85434	-0.738831	-0.400673	2.29251	NA	NA	NA	0.356876
Mim-are	Mimosa_arenosa	Chamela	2.40556	-1.05122	2.04164	-1.31222	-0.249029	2.05687	-0.124706	-0.0537544	-0.000894878	6.12866
Pip-obl	Piptadenia_obliqua	Chamela	2.34337	-0.71136	2.17258	-0.668672	-0.344996	2.20731	-0.131378	0.0142556	-0.0265114	1.21713
Plu-rub	Plumeria_rubra	Chamela	2.35459	-0.439581	2.74797	0.186352	-0.811044	2.91519	0.372481	-0.00164486	-0.0842409	-11.6213
Rau-tet	Rauvolfia_tetraphylla	Chamela	2.7236	-0.661942	2.78558	0.915139	-0.432167	2.30301	NA	NA	NA	NA
Rec-mex	Recchia_mexicana	Chamela	2.13607	-0.804446	2.21417	0.548388	-0.234031	2.25857	0.29397	-0.0507461	-0.0515034	2.647
Rup-pal	Ruprechtia_pallida	Chamela	2.28246	-0.667562	2.26033	0.0432261	-0.258614	2.09315	0.0205915	-0.0463825	-0.031979	3.07532
Sen-ato	Senna_atomaria	Chamela	2.38346	NA	2.45484	NA	-0.259637	NA	NA	NA	NA	17.3297
Sen-sp	Senna_sp	Chamela	2.95129	-0.72723	2.84537	-0.0402016	-0.431159	2.26585	NA	NA	NA	-0.593788
Spo-pur	Spondias_purpurea	Chamela	2.78046	-0.692771	2.83035	0.49359	-0.628039	2.57473	NA	NA	NA	-19.9151
Swi-hum	Swietenia_humilis	Chamela	2.22821	-0.8146	2.14472	1.03272	-0.206499	2.28265	-0.162885	0.000614355	0.0276115	1.95017
Tab-ros	Tabebuia_rosea	Chamela	2.62161	-0.701438	2.72699	1.63011	-0.710368	2.6341	NA	NA	NA	4.17029
Zap-For	Zapoteca_formosa	Chamela	2.66405	-0.823495	2.39257	0.56331	-0.224019	1.9953	NA	NA	NA	9.1772
